# Supplementary material
Source: publisher site journal article supplement (https://www.degruyterbrill.com/publication/journal_key/ZFK/downloadAsset/ZFK_Gestaltungsrichtlinien.pdf)
Supplement: Supplementary file 1 [file ZFK_Gestaltungsrichtlinien.pdf]

## GESTALTUNGSRICHTLINIEN

### Allgemeines

- Schriftgröße 12pt, Schriftart: Times New Roman, Zeilenabstand: 1,5 (Fußnoten: 10pt, Zeilenabstand 1,0)
- linksbündig (kein Blocksatz), keine Silbentrennung
- Zwischenüberschriften o.ä. bitte nicht über Formatvorlagen erstellen, stattdessen Zwischenüberschriften fett markieren
- bitte keine zusätzlichen Leerzeilen bei der Trennung von Absätzen
- es gilt die neue deutsche Rechtschreibung
- bzgl. der Verwendung von Binnen-I, »gender gap« etc. bitten wir um Rücksprache mit den jeweiligen Heft-HerausgeberInnen
- bei Abkürzungen wie u.a., z.B., d.h., d.i., e.g.... bitte keine Leerzeichen setzen
- wir bitten um die Nutzung der sog. »französischen Anführungszeichen«
  - einfache Anführungszeichen (› ‹) dienen zur Kennzeichnung von Binnenzitaten sowie der Kennzeichnung des distanzierten Sprechens

### Zahl und Umfang der Aufsätze/Debattenbeiträge

die angegebenen Zeichenzahlen orientieren sich an Erfahrungswerten für eine übliche ZfK-Ausgabe mit 120 Seiten

- **Aufsätze**
  - insg. ca. 210.000 Zeichen inkl. Leerzeichen & Fußnoten
  - durchschnittliche Länge der Aufsätze: ca. 40.000 Zeichen – also ca. 5-6 Aufsätze inkl. Einleitung durch HerausgeberInnen
  - je nach Umfang der Rubrik »Adapter« verringert sich der Umfang des Aufsatzteils
- **Debatte**
  - insg. 70.000 Zeichen inkl. Leerzeichen
  - für das Eingangsstatement stehen ca. 20.000 Zeichen zur Verfügung; für 4-5 Repliken jeweils ca. 10.000 Zeichen
  - im Debattenteil sollte auf Fußnoten verzichtet werden

### Verwendung von Bildern

- die Klärung der Bildrechte und den evtl. Erwerb notwendiger Lizenzen liegt in der Verantwortung der AutorIn – bitte beachten Sie, dass Bildrechte stets für eine gedruckte wie auch elektronische Publikation angefordert werden müssen (bei Bedarf geben wir gerne Informationen zur Auflagenhöhe)
- Abbildungen werden – wenn nichts anderes mit den Heft-HerausgeberInnen vereinbart ist – in Graustufen auf normalem Papier gedruckt
- neben einer kurzen Bildunterschrift (Autor, Titel, Datierung der Abbildung) erfolgt eine genaue Aufschlüsselung der Bildherkunft in den »Abbildungsnachweisen« (nach dem Literaturverzeichnis)
- **Anforderungen:**
  - Dateiformat: TIFF- oder EPS-Dateien; ebenfalls möglich sind unkomprimierte JPEG-Dateien
  - Auflösung: mind. 300dpi
  - Farbmodus: Graustufen bzw. CMYK-Modus (kein RGB-Modus)

### **Fußnoten**

- Anmerkungen und weiterführende Literaturhinweise können als Fußnoten in den Text integriert werden
- Mit Blick auf eine gute Lesbarkeit der Artikel bitten wir jedoch, mit Fußnoten sparsam umzugehen

### **Zitate und Verweise**

- die »Zeitschrift für Kulturwissenschaften« richtet sich nach der sog. Harvard-Zitation, also AutorIn-Jahr-Zitierweise in Klammern im Fließtext, sowohl bei direkten Zitaten als auch bei indirekten Zitaten, Paraphrasen, Literaturverweisen – Beispiele:
  - Dies kann ein Beispiel für eine Paraphrasierung sein (vgl. Sheller 2003: 125-130; Graeber 2011: 24).
  - Der Anschaulichkeit halber soll dies »[...] ein direktes Zitat darstellen« (Kastner/Waibel 2012: 21f.).
- endet ein direktes Zitat in einem Satz mit einem Punkt, so wird der Punkt (ohne die Verwendung von Auslassungszeichen) getilgt – direkte Zitate, sowohl mitten im Satz als auch an dessen Ende, enden also nie mit einem Punkt
- Literaturhinweise, indirekte Zitate, Paraphrasen werden ausschließlich mit »vgl.« (nicht »siehe«, »siehe auch« etc.) markiert; bei mehreren Literaturangaben werden diese durch ein Semikolon getrennt – ein erneutes »vgl.« ist nicht nötig
- wir bitten um eine exakte Eingrenzung der Seitenzahlen statt mit der Abkürzung »ff.«; die Nutzung von »f.« ist aber erwünscht (ohne Leerzeichen zur Seitenzahl)
- ebenfalls bitten wir auf die Verwendung von »ebd.« zu verzichten
- Binnenauslassungen werden mit [...] gekennzeichnet; Ergänzungen sowie Anpassungen der Orthographie werden ebenfalls mit eckigen Klammern gekennzeichnet
  - Ausnahme: bei der Zitation einzelner Begriffe, Redewendungen etc. kann auf das Kenntlichmachen der Auslassung verzichtet werden
- bei Zitaten im Zitat werden einfache Anführungszeichen (‘ ’) genutzt
- bei Zitaten, die im Fließtext mehr als zwei Zeilen einnehmen, bitten wir um farbliche Hervorhebung, damit die Abschnitte im Satz eingerückt werden können

### **Hervorhebungen & Kursivierungen**

- Kursivierungen im Fließtext bei Begriffen aus Fremdsprachen (*soft science*, *othering*) sowie bei Buch-, Zeitschriften- und Filmtiteln
- Hervorhebungen bei Zitaten im Original, die beibehalten werden sollen, sollten mit dem Hinweis »Hervorhebung im Orig.« vermerkt werden – bei eigenen Hervorhebungen bitte den Vermerk »Hervorhebung d. Verf.« mit Semikolon abgetrennt in die Klammer einfügen, Bsp.: (Schmid 1995: 32; Hervorhebung d. Verf.)

### **Literaturverzeichnis**

- das Literaturverzeichnis am Ende des Beitrags ist mit »Literatur« überschrieben und schlüsselt die Autor-Jahr-Angaben aus dem Fließtext auf
- im Literaturverzeichnis werden die zitierten Werke wie folgt aufgeschlüsselt [an Anführungszeichen denken] – bei mehr als drei Autoren/Herausgebern kann mit »et al.« abgekürzt werden

- **Zeitschriftenartikel:**  
WERNER, Michael/Zimmermann, Bénédic (2002): »Vergleich, Transfer, Verflechtung. Der Ansatz der Histoire croisée und die Herausforderung des Transnationalen«. In: *Geschichte und Gesellschaft* 28: 4, 607-636.
- **Aufsätze in Sammelbänden:**  
KERESZTESI, Rita (2011): »Hurston in Haiti: Neocolonialism and Zombification«. In: *Race, Oppression and the Zombie: Essays on Cross-cultural Appropriations of the Caribbean Tradition*, hg. v. Christopher Moreman/Cory Rushton, Jefferson/North Carolina: McFarland, 31-41.
- **Monographien und Sammelbände:**  
GRAEBER, David (2011): *Debt. The First 5000 Years*, Brooklyn: Melville House Publishing.  
NECKEL, Sighard/Wagner, Greta (Hg.) (2011): *Leistung und Erschöpfung. Burnout in der Leistungsgesellschaft*, Frankfurt/Main: Suhrkamp.
- **reine Internetquellen** (die Zahlen in Klammern bezeichnen den letzten Zugriff):  
HARRASSER, Karin (2010): »Unterleben«, <http://www.untot.info/44-0-karin-harrasser-unterleben.html> (01.03.2013).
- **Artikel aus Zeitungen, Publikumsmagazinen** (mit evtl. URL)  
HAVRILESKY, Heather (2011): »Steve Jobs: Vampire. Bill Gates: Zombie«. In: *New York Times*, 28.10.2011, <http://www.nytimes.com/2011/10/30/magazine/steve-jobs-vampire-bill-gates-zombie.html> (20.12.2013).  
FAZ, o.V. (2013): »China will Zombie-Unternehmen sterben lassen«. In: *Frankfurter Allgemeine Zeitung*, 24.07.2013, <http://www.faz.net/aktuell/wirtschaft/wirtschaftspolitik/2456385.html> (20.12.2013).
- **Gesamtausgaben und historische Quellen** – Erstausgaben können in eckige Klammern hinter die Neuauflage gesetzt werden  
SEABROOK, William (1982 [1929]): *Geheimnisvolles Haiti. Rätsel und Symbolik des Wodu-Kultes*, übers. v. Alfons Mathias Nuese, München: Seitz.  
MARX, Karl (1983): »Grundrisse der Kritik der politischen Ökonomie«. In: Ders./Friedrich Engels: *Werke (MEW)*, hg. v. Institut für Marxismus-Leninismus beim ZK der SED, Bd. 42, Berlin: Dietz, 15-768.
- bei mehr als zwei Verlagsorten wird mit u.a. abgekürzt; zwei Verlagsorte werden durch Komma getrennt, örtliche Spezifizierungen durch Schrägstrich ergänzt (Frankfurt/Main, Cambridge/Massachusetts)  
SHELLER, Mimi (2003): *Consuming the Caribbean: From Arawaks to Zombies*, London, New York: Routledge.  
BECK, Ulrich/Beck-Gernsheim, Elisabeth (2002): *Individualization. Institutionalized Individualism and its Social and Political Consequences*, London u.a.: Sage.

Bei weiteren Fragen zur Manuskriptgestaltung wenden Sie sich gerne an die Redaktionsassistentin der »Zeitschrift für Kulturwissenschaften« (Michael Geuenich, [michael.geuenich@uni-muenster.de](mailto:michael.geuenich@uni-muenster.de)).
